# Supplementary material
Source: publisher figshare collection journal article supplement (https://frontiersin.figshare.com/ndownloader/files/14905724)
Supplement: Supplementary file 1 [file 14905724]

**Supplementary Information**

**
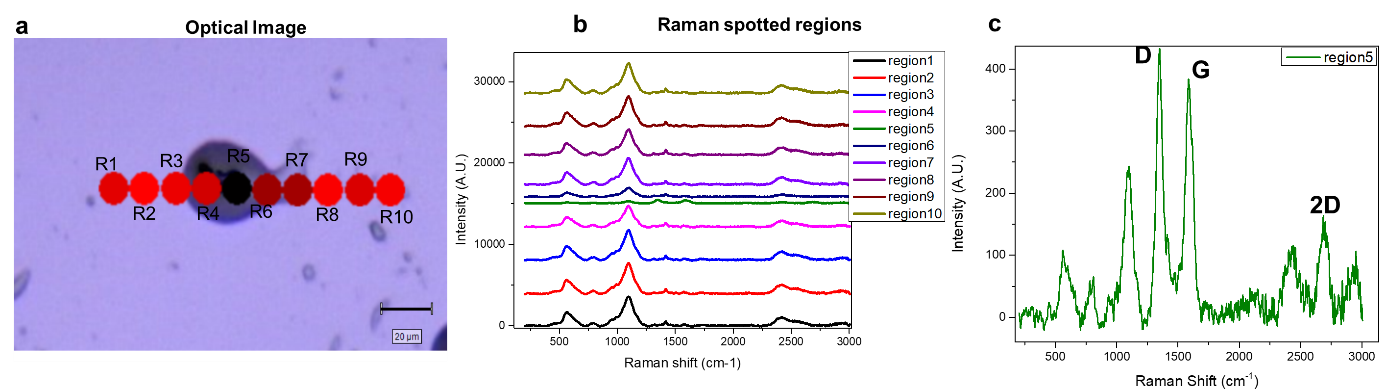
**

**Figure S1:** (a) Optical image of RS/CNT marked with different regions R1-R10 over glass substrate. (b) Raman spectrum correspond to the regions marked in panel (a). (c) Region 5 (green colour) is showing the presence of CNT peaks along with Silk fibroin.

**
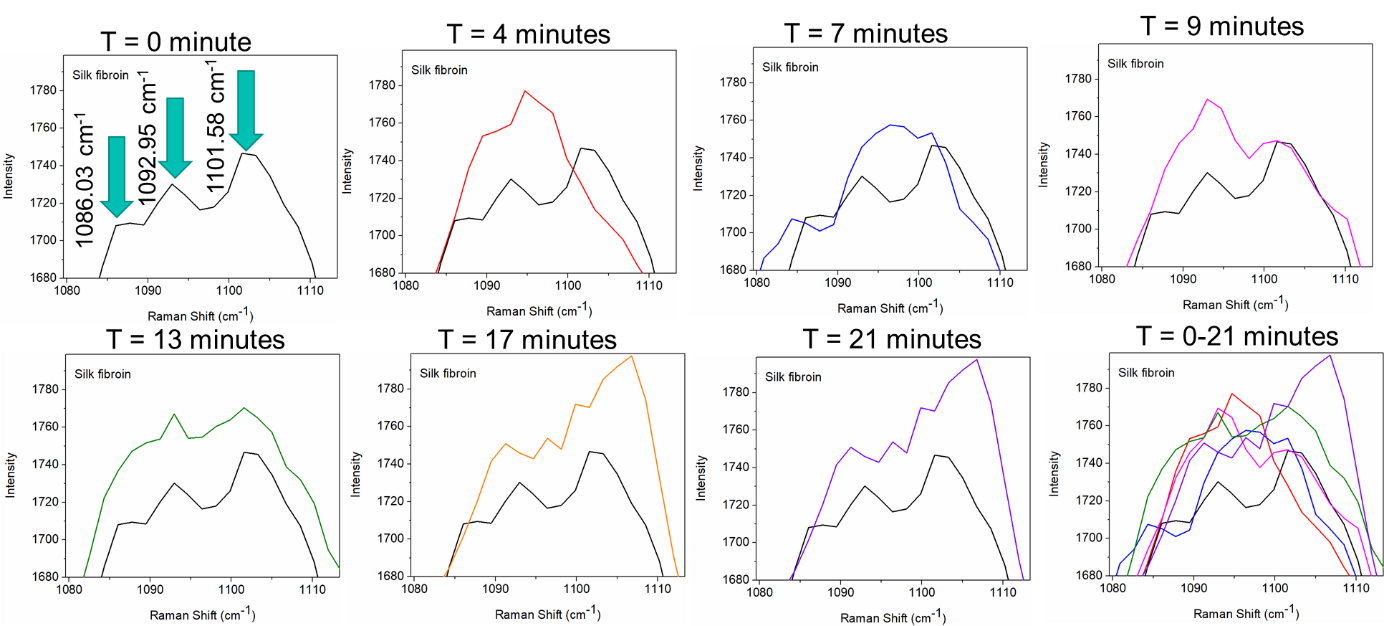
**

**Figure S2:** Peak positions range between 1080 cm-1 to 1110 cm-1 of silk fibroin varies at different time interval from 0 minute to 21 minutes. The spectra obtained at t = 0 minute is used as reference for other panels distinctly indicating transformation in the silk fibroin with time.

**
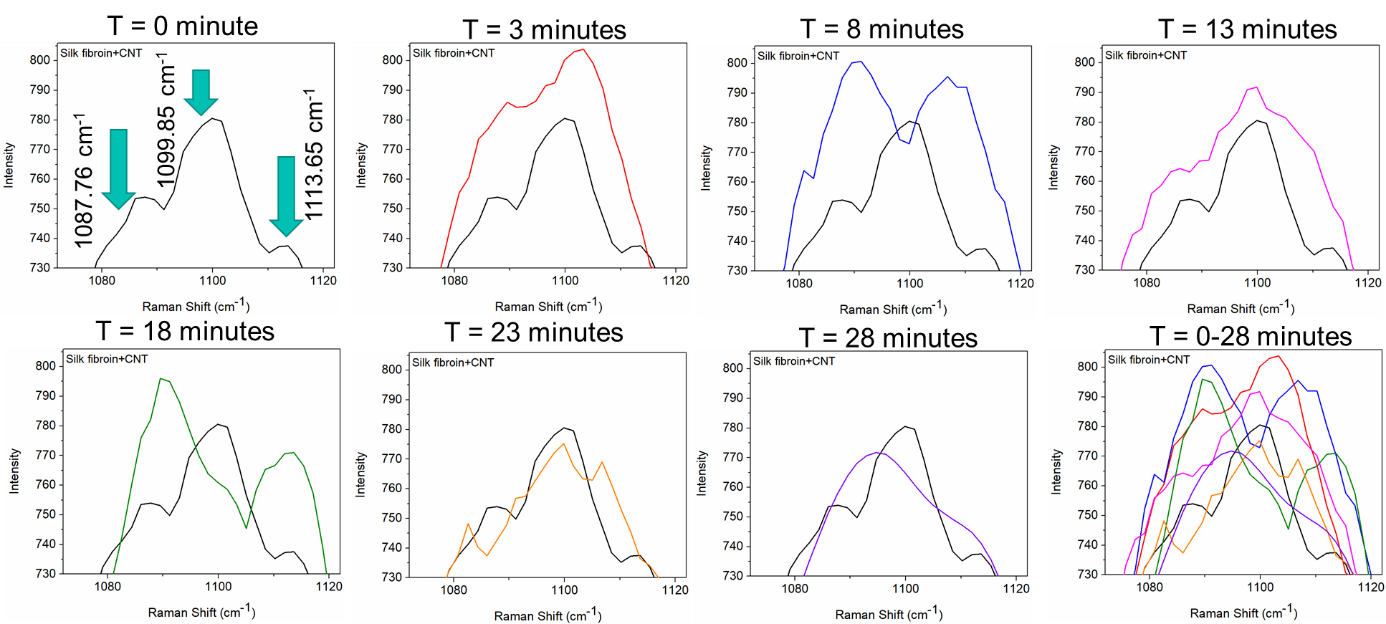
**

**Figure S3:** Peak positions range between 1080 cm-1 to 1115 cm-1 of silk fibroin+CNT varies at different time interval from 0 minute to 28 minutes. The spectra obtained at t = 0 minute is used as reference for other panels.
